# Supplementary material for: Fucosylated chondroitin sulfate from Acaudina molpadioides improves hyperglycemia via activation of PKB/GLUT4 signaling in skeletal muscle of insulin resistant mice
Source: Royal Society of Chemistry journal article supplement (doi:10.1039/c3fo60247h), 2013-01-01
Supplement: c3fo60247h.pdf [file c3fo60247h.pdf]

**Supplementary table 1** PCR primers used in glucose uptake-related genes mRNA expression

research

| Genes          | Forward primer              | Reverse primer              |
|----------------|-----------------------------|-----------------------------|
| IR             | 5'-CCTACTGCTATGGGCTTCG-3'   | 3'-GTTCTGGTCTGGGCTTCTA-5'   |
| IR             | 5'-TTGCTTGGCACAATGTAGAA-3'  | 3'-GAGGATCGTCAATAGCGTAAC-5' |
| S-1            |                             |                             |
| PI3            | 5'-CCCATACAAGGTGTTAGCC-3'   | 3'-ACTCTGACCTGGGATACCG-5'   |
| K              |                             |                             |
| PK             | 5'-CCAGATGGTAGCCAACAGT-3'   | 3'-GATAGAGTTTGAGGAGCCG-5'   |
| B              |                             |                             |
| GL             | 5'-ACTAAGAGCACCGAGACCAA'    | 3'-CTGCCCGAAAGAGTCTAAAG-5'  |
| UT4            |                             |                             |
| $\beta$ -actin | 5'-CAAGGCATTGCTGACAGGATG-3' | 3'-GGTCGTCTACACCTAGTCGT-5'  |
